# Supplementary material for: Exploring the potential of a ZIF-8@MCM-41-based heterostructured material for battery-type electrodes for supercapatteries
Source: Royal Society of Chemistry journal article supplement (doi:10.1039/d4nj02596b), 2024-01-01
Supplement: d4nj02596b1.pdf [file d4nj02596b1.pdf]

## Supplementary information

### Exploring the Potential of ZIF-8@MCM-41-based Heterostructured Material for Battery-Type Electrodes for Supercapatteries

Josefa Dina Santos,<sup>a</sup> Jhonatam Pinheiro Mendonça,<sup>b</sup> Vanessa N. S. Campos,<sup>b</sup> Mayara M. Teixeira,<sup>b</sup> Anderson J. Schwanke,<sup>c</sup> Katia Bernardo-Gusmão,<sup>c</sup> Aluisio A. Cabral,<sup>a</sup> Samuel Filgueiras Rodrigues,<sup>a</sup> Antônio Ernandes Macedo Paiva,<sup>a</sup> Ana C. S Alcântara,<sup>b,\*</sup> Marco Aurélio Suller Garcia,<sup>b,\*</sup> Alex Rojas<sup>a,\*</sup>

<sup>a</sup>Instituto Federal de Educação Ciência e Tecnologia do Maranhão (IFMA), Programa de Pós-graduação em Engenharia de Materiais – PPGEM. Av. Getúlio Vargas, Monte Castelo, São Luis, MA, Brazil.

<sup>b</sup>Department of Chemistry, Federal University of Maranhao, Avenida dos Portugueses, 1966, 65080-805 São Luís (MA) Brazil.

<sup>c</sup>Instituto de Química, Universidade de Federal do Rio Grande do Sul (UFRGS), 91501-970. Porto Alegre, RS, Brazil

\* Corresponding author.

E-mail address: [alex1981rojas@hotmail.com](mailto:alex1981rojas@hotmail.com) (Alex Rojas); [marco.suller@ufma.br](mailto:marco.suller@ufma.br) (Marco A. S. Garcia); [ana.alcantara@ufma.br](mailto:ana.alcantara@ufma.br) (A.C.S. Alcântara).

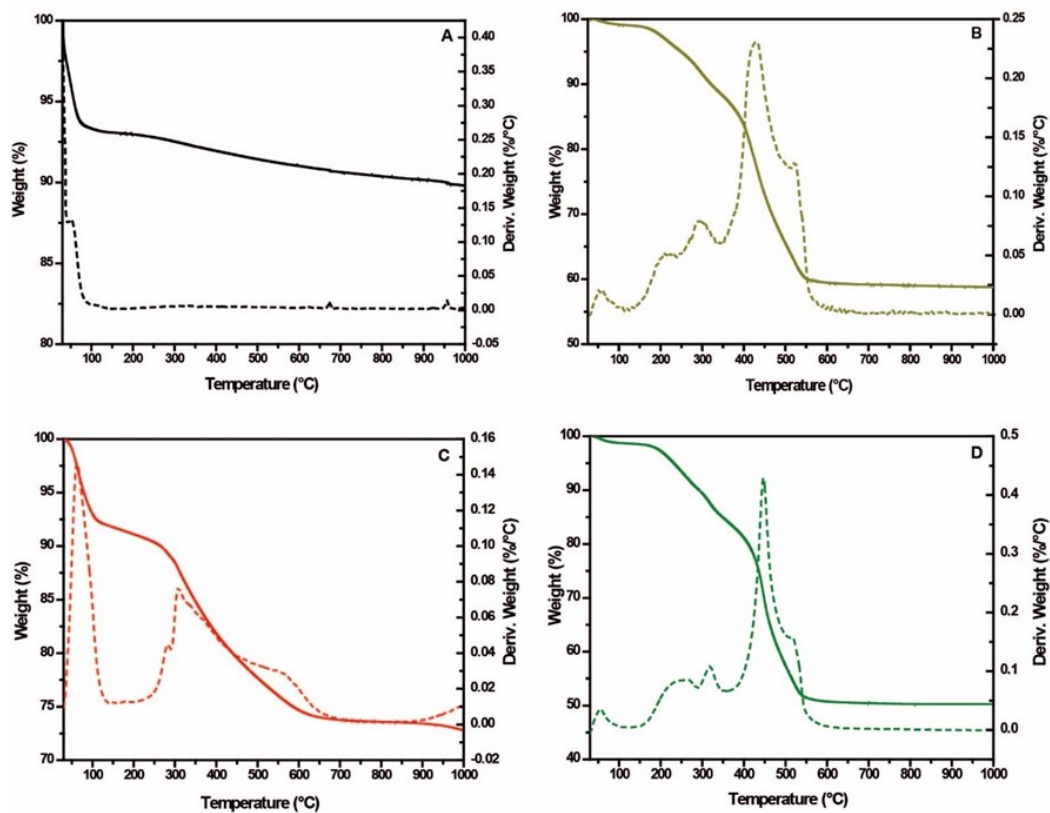

**Figure S1.** TG curves recorded under air-flow conditions for the A) MCM-41, B) ZIF-8, C) NH<sub>2</sub>-MCM-41, and D) ZIF-8@NH-MCM-41 samples.

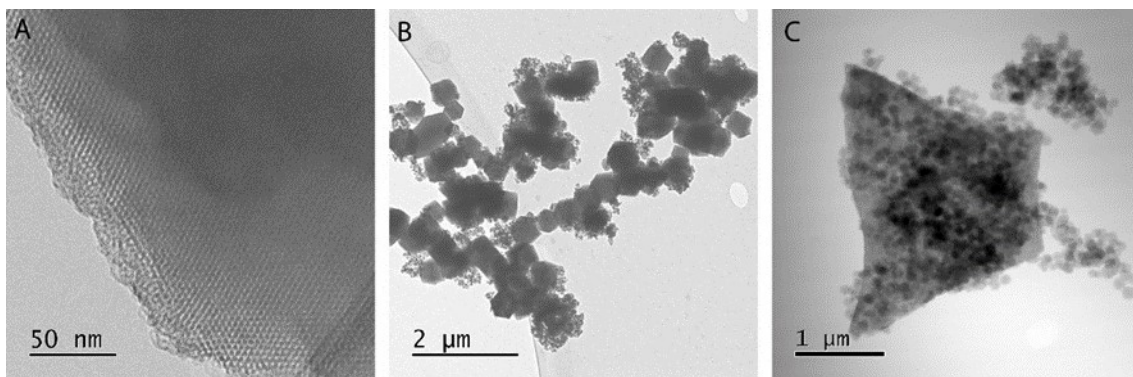

**Figure S2.** TEM images of A) MCM-41, B) ZIF-8, and C) ZIF-8@NH-MCM-41.

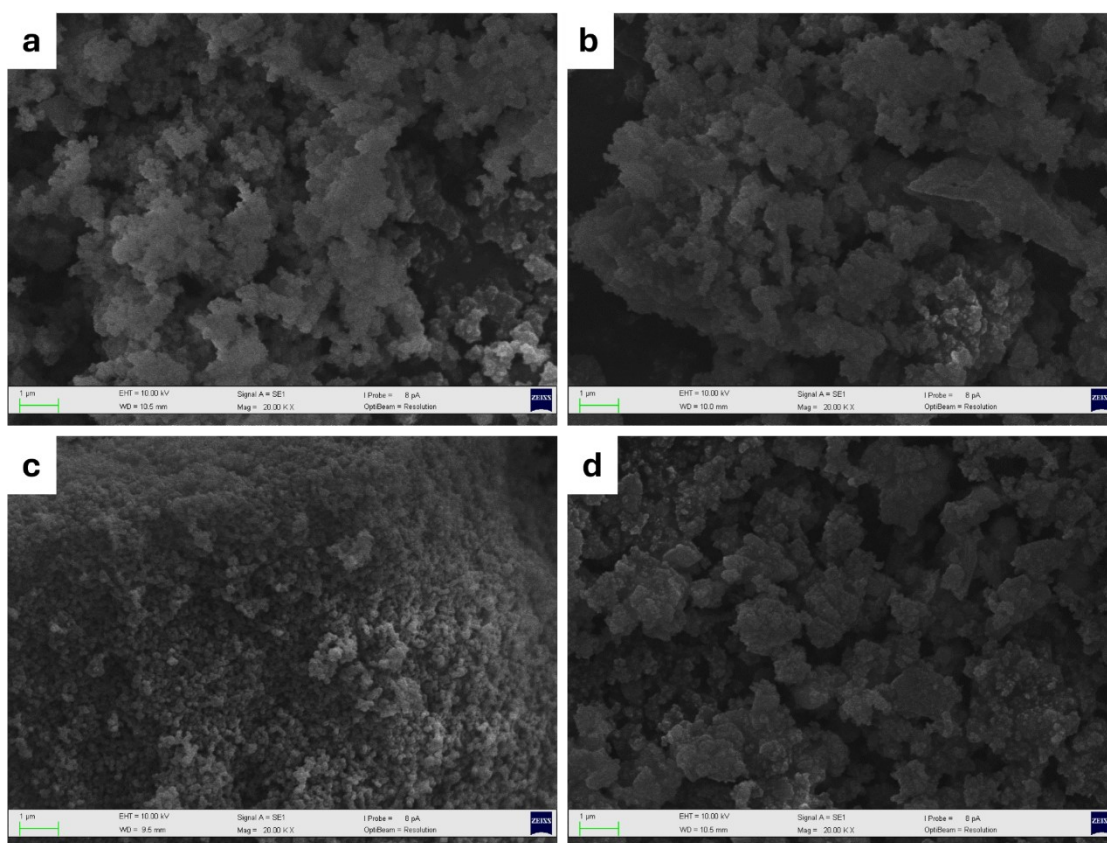

**Figure S3.** SEM images of (a) MCM-41, (b) NH<sub>2</sub>-MCM-41, (c) ZIF-8, (d) ZIF-8@NH-MCM-41 samples. Under 20 kx of magnification.

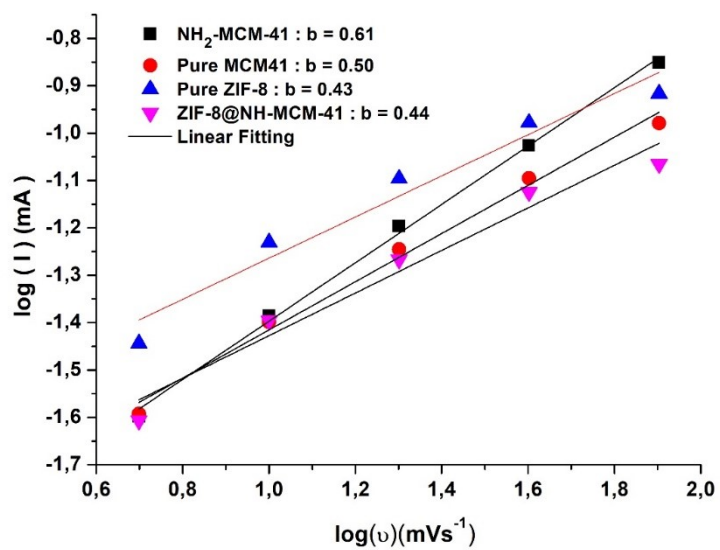

**Figure S4.** Plot of  $\log v$  against  $\log i$  for all the materials.

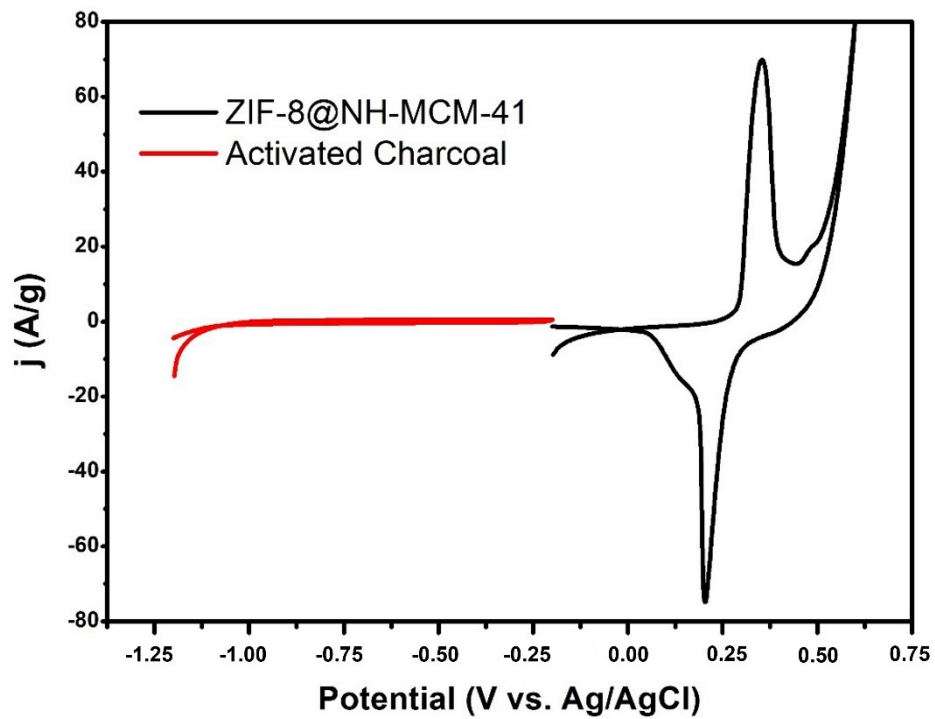

**Figure S5.** CV spectrum of the AC and ZIF-8@NH-MCM-41 material at  $5 \text{ mV s}^{-1}$ .

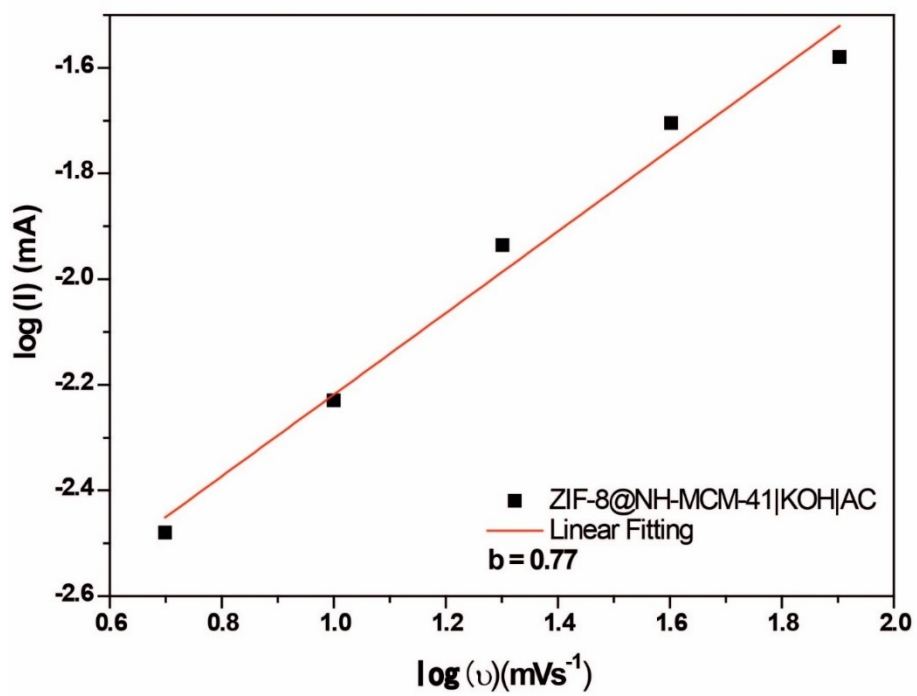

**Figure S6.** Plot of  $\log v$  against  $\log i$  for the asymmetric supercapacitor cell.

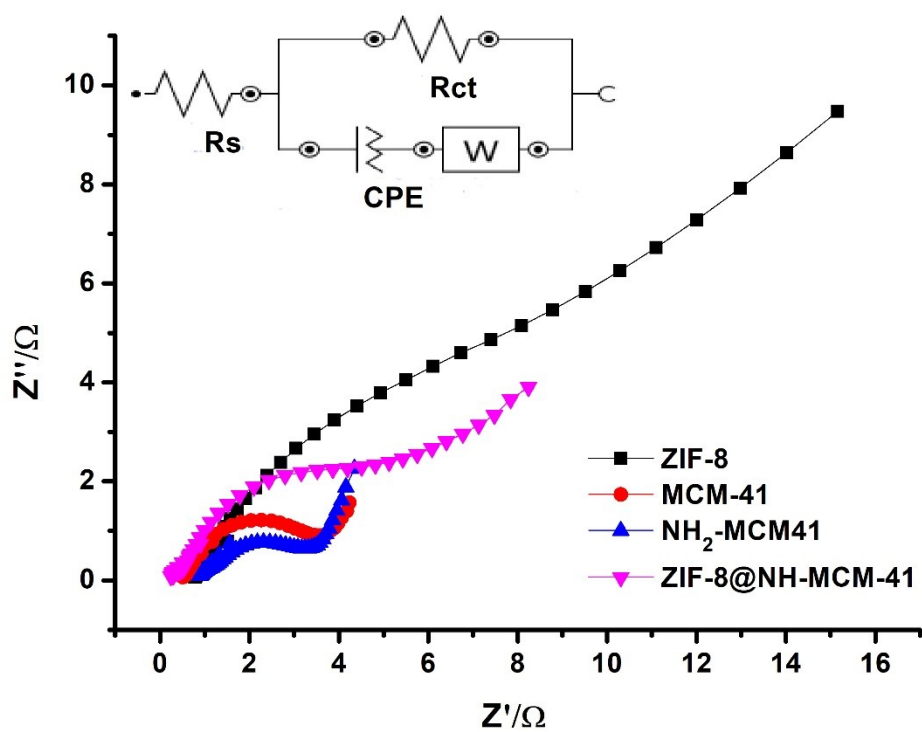

**Figure S7.** A) EIS Nyquist diagram. *Inset* shows the equivalent circuit used for the fitting impedance spectra

**Table S1.** Specific capacitance and coulombic efficiency at different current densities of MCM-41, NH<sub>2</sub>-MCM-41, ZIF-8, and ZIF-

| NH <sub>2</sub> -MCM41               |                                           |                            | MCM-41                               |                                           |                            | ZIF-8                                |                                           |                            | ZIF-8@NH-MCM-41                      |                                           |                            |
|--------------------------------------|-------------------------------------------|----------------------------|--------------------------------------|-------------------------------------------|----------------------------|--------------------------------------|-------------------------------------------|----------------------------|--------------------------------------|-------------------------------------------|----------------------------|
| Current Density<br>A g <sup>-1</sup> | Specific Capacitance<br>F g <sup>-1</sup> | Coulombic Efficiency<br>n% | Current Density<br>A g <sup>-1</sup> | Specific Capacitance<br>F g <sup>-1</sup> | Coulombic Efficiency<br>n% | Current Density<br>A g <sup>-1</sup> | Specific Capacitance<br>F g <sup>-1</sup> | Coulombic Efficiency<br>n% | Current Density<br>A g <sup>-1</sup> | Specific Capacitance<br>F g <sup>-1</sup> | Coulombic Efficiency<br>n% |
| 1                                    | 2251.21                                   | 66.88                      | 1                                    | 2656.09                                   | 91.97                      | 1                                    | 1395.23                                   | 75.18                      | 1                                    | 3245.56                                   | 95.52                      |
| 2                                    | 1878.04                                   | 74.90                      | 2                                    | 2302.43                                   | 82.66                      | 2                                    | 1109.523                                  | 81.46                      | 2                                    | 2582.27                                   | 72.96                      |
| 4                                    | 1717.07                                   | 84.21                      | 4                                    | 2039.02                                   | 86.7                       | 4                                    | 1009.523                                  | 86.88                      | 4                                    | 2318.98                                   | 83.57                      |
| 6                                    | 1639.02                                   | 89.6                       | 6                                    | 1858.53                                   | 90.07                      | 6                                    | 928.571                                   | 89.04                      | 6                                    | 2156.96                                   | 87.11                      |
| 8                                    | 1560.97                                   | 90.9                       | 8                                    | 1736.58                                   | 92.7                       | 8                                    | 876.19                                    | 92                         | 8                                    | 2025.31                                   | 90.09                      |
| 10                                   | 1512.19                                   | 92.5                       | 10                                   | 1658.53                                   | 94.44                      | 10                                   | 833.333                                   | 94.59                      | 10                                   | 1898.73                                   | 89.28                      |

8@NH-MCM-41.



**Table S2.** Specific Capacity, Specific Energy density Asymmetric

| ZIF-8@NH-MCM-41  KOH  AC             |                                          |                                           |                                     |                                       |
|--------------------------------------|------------------------------------------|-------------------------------------------|-------------------------------------|---------------------------------------|
| Current Density<br>A g <sup>-1</sup> | Specific Capacity<br>mAh g <sup>-1</sup> | Specific Capacitance<br>F g <sup>-1</sup> | Power Density<br>W kg <sup>-1</sup> | Energy Density<br>Wh kg <sup>-1</sup> |
| 1                                    | 15.55                                    | 31.6                                      | 495                                 | 7.7                                   |
| 2                                    | 12.22                                    | 24.8                                      | 998.1                               | 6.1                                   |
| 4                                    | 8.88                                     | 18                                        | 1980                                | 4.4                                   |
| 6                                    | 6.66                                     | 13.5                                      | 2970                                | 3.3                                   |
| 8                                    | 6.6                                      | 13.5                                      | 3960                                | 3.3                                   |
| 10                                   | 5.5                                      | 11.3                                      | 4860                                | 2.7                                   |

capacitance, Power Density and Supercapacitor Cell (ASCs).
